# Supplementary material
Source: publisher site journal article supplement (https://www.dovepress.com/article/402002)
Supplement: Supplementary file 1 [file get_supplementary_file.php]

Supplemental Table S1Operational definition of frailty phenotype in this study

| **Components** | **Definition** |
| --- | --- |
| Unintentional weight loss | Unintentional loss of more than 2–3 kg in the previous 6 months |
| Low grip strength | Grip strength in the lowest 20%, stratified by gender and BMI (kg/m2) |
| Men, ≤27.6 kg for BMI <18.5; ≤32.2 kg for 18.5 ≤ BMI <25.0; ≤30.3 kg for 25.0 ≤ BMI <30.0; ≤29.6 kg for BMI ≥30.0 |
| Women, ≤20.0 kg for BMI <18.5, ≤19.5 kg for 18.5 ≤ BMI <25.0, ≤20.4 kg for 25.0 ≤ BMI <30.0, ≤20.0 kg for BMI ≥30.0 |
| Exhaustion | A positive answer to either of two questions regarding the previous month:  "Did you feel that everything you did was an effort?" and "Did you feel exhausted without any reason?" |
| Slow gait speed | Time of 5-meter walk test at one's maximum waking speed in the highest 20%, stratified by gender and standing height (gender-specific cutoff: a medium height) |
| Men, Time ≥3.07 s for height <165.0 cm or Time ≥2.83 s for height ≥165.0 cm |
| Women, Time ≥3.17 s for height <152.3 cm or Time ≥2.95 s for height ≥152.3 cm |
| Low physical activity | Lowest 20% of energy expenditure of physical activity by a triaxial accelerometer; quantified as kilocalories/kg (body weight), stratified by gender |
| Men, ≤6.62 kcal/kg/day |
| Women, ≤8.23 kcal/kg/day |
| Overall frailty status | Non-frailty (or robust), 0 affected component; Pre-frailty, 1–2 affected components; Frailty ≥3 affected components |

Supplemental Table S2 The site-specific prevalence of chronic pain between the nociceptive pain group and the neuropathic-like symptoms group

| **Musculoskeletal site** | **Nociceptive pain**  **n (%)** | **Neuropathic-like**  **Symptoms**  **n (%)** |
| --- | --- | --- |
| Shoulders | 215 (41.2) | 35 (50.7) |
| Elbows | 68 (13.0) | 13 (18.8) |
| Wrists/hands | 56 (10.7) | 17 (24.6)** |
| Neck | 74 (14.2) | 16 (23.2) |
| Low back | 270 (51.7) | 38 (55.1) |
| Hips | 64 (12.3) | 21 (30.4)** |
| Knees | 208 (39.9) | 41 (59.4)** |
| Feet | 55 (10.5) | 24 (34.8)** |

**Notes:** **p<0.01 vs. Nociceptive pain.

Supplemental Table S3 The ORs and 95%CIs for the presence of sub-items of frailty components according to the status of chronic pain types

| **Chronic pain type** | **Unintentional weight loss**  **OR (95%CI)** | **p-value** | **Low grip strength**  **OR (95%CI)** | **p-value** | **Exhaustion**  **OR (95%CI)** | **p-value** | **Slow gait speed**  **OR (95%CI)** | **p-value** | **Low physical activity**  **OR (95%CI)** | **p-value** |
| --- | --- | --- | --- | --- | --- | --- | --- | --- | --- | --- |
| No-chronic pain | 1.00 (ref.) |  | 1.00 (ref.) |  | 1.00 (ref.) |  | 1.00 (ref.) |  | 1.00 (ref.) |  |
| Nociceptive pain | 1.58  (0.82–3.07) | 0.17 | 1.44  (0.89–2.33) | 0.14 | 2.57  (1.34–4.93) | <0.01 | 0.93  (0.56–1.55) | 0.78 | 1.33  (0.78–2.25) | 0.30 |
| Neuropathic-like symptoms | 1.64  (0.55–4.87) | 0.38 | 1.71  (0.77–3.80) | 0.19 | 1.75  (0.63–4.82) | 0.28 | 2.29  (1.05–5.01) | 0.04 | 0.97  (0.39–2.42) | 0.95 |

**Notes:** Binomial logistic regression analyses were used to estimate the ORs and 95%CIs for the presence of sub-items of frailty components according to the status of chronic pain types. The multivariable model was adjusted for age, sex, education level, employment status, subjective economic status, comorbidity, underweight, overweight, cognitive impairment, current smoking, current alcohol consumption, regular exercise, living alone, number of communications with another person per month, experiences of bereavement, and pain intensity.
